# Supplementary material
Source: publisher figshare collection journal article supplement (https://gsajournals.figshare.com/ndownloader/files/25728062)
Supplement: Supplementary file 1 [file 25728062]

## Sheet: Table S1
Liu, Neuenkirchen et al. - Table S1
Table S1. DamID Sequencing Reads and Mapping Rate
	Total reads	Starting with GATC	Perfect mapping	Mapping rate
			(no mis-match)
Dam-only #1	60768117	33327762	20919792	0.628
Dam-only #2	50482095	27686651	17028075	0.615
Dam-only #3	57484440	31464926	19763353	0.628
Dam-Piwi(WT) #1	26723020	25713066	17258057	0.671
Dam-Piwi(WT) #2	27824536	26932568	17897382	0.665
Dam-Piwi(WT) #3	33566565	32571148	21667131	0.665
Dam-Piwi(YK) #1	35243967	19633176	11549270	0.588
Dam-Piwi(YK) #2	45286270	24962247	15061333	0.603
Dam-Piwi(YK) #3	46307992	25508722	15740986	0.617
